# Supplementary material
Source: PubMed Central journal article supplement (PMC5440213)
Supplement: NIHMS837798-supplement-Supplementary_Table_S1.pdf [file NIHMS837798-supplement-Supplementary_Table_S1.pdf]

**Table S1. The primers used in the study**  
Sites for restriction enzymes are underlined.

| Primer name                                        | Primer sequence (5'-3')                                          | PCR                                    |
|----------------------------------------------------|------------------------------------------------------------------|----------------------------------------|
| <b>Primers for making constructs</b>               |                                                                  |                                        |
| EZH2-5'                                            | CGCGGATCCATGGGCCAGACTGGGAAGAAAT                                  | 94 °C, 30 s; 58 °C, 30 s; 72 °C, 90 s; |
| EZH2-3'                                            | CCGCTCGAGTCAAGGGATTCCATTTCTCTTTC                                 | 35 cycles                              |
| SUZ12-5'                                           | CCGCTCGAGATGGCGCCTCAGAAGCACG                                     | 94 °C, 30 s; 58 °C, 30 s; 72 °C, 90 s; |
| SUZ12-3'                                           | CCGGAATTCTCAGAGTTTTTGTGTTTTTGCTCTG                               | 35 cycles                              |
| EED-5'                                             | CGCGGATCCATGTCCGAGAGGGAAGTGTC                                    | 94 °C, 30 s; 58 °C, 30 s; 72 °C, 60 s; |
| EED-3'                                             | CCGCTCGAGTTATCGAAGTCGATCCCAGC                                    | 35 cycles                              |
| EZH2-RM-5'                                         | GATGGAAGTAGTAATCACGTTTACAACCTATCAACCCTG                          |                                        |
| EZH2-RM-3'                                         | ACGTGATTACTACTTCCATCCTTTTTTCAGCTGTATCTTTC                        |                                        |
| Luc2-5'                                            | CGCGGATCCAATGGAAGATGCCAAAAACATTA                                 | 94 °C, 30 s; 58 °C, 30 s; 72 °C, 90 s; |
| Luc2-3'                                            | CCAGCGGCCGCTTACACGGCGATCTTGCCG                                   | 35 cycles                              |
| Rluc-5'                                            | ACGCGTCGACGCCACCATGACTTCGAAAGT                                   | 94 °C, 30 s; 58 °C, 30 s; 72 °C, 90 s; |
| Rluc-3'                                            | CGCGGATCCCTCGAGTTGTTTCAATTTTGAGAACTCGC                           | 35 cycles                              |
| miniEZH2-5'                                        | ACGCGTCGACGCCACCATGTGGGCTGCACACTGCAGAA                           | 94 °C, 30 s; 58 °C, 30 s; 72 °C, 60 s; |
| miniEZH2-3'                                        | CGCGGATCCCCTTTTTGGAGCCCCGCTGAAT                                  | 35 cycles                              |
| mutExon14-5'                                       | TGTAGTTCATAGTGTAAGTATTTGTGCTTTG                                  |                                        |
| mutExon14-3'                                       | ACTTACACTATGAACTACATTGACAAAACCT                                  |                                        |
| BSD-5'                                             | ACGCGTCGACGCCACCATGGCCAAGCCTTTGTCTCAA                            | 94 °C, 30 s; 58 °C, 30 s; 72 °C, 40 s; |
| BSD-3'                                             | CGCGGATCCCTCGAGGCCCTCCACACATAACCAGA                              | 35 cycles                              |
| <b>Primers for making shRNA and sgRNA plasmids</b> |                                                                  |                                        |
| EZH2-1#-F                                          | TGGACGGCTCCTCTAACCATGTTTCAAGAGAACATGGTTAGAGGAGCCGTCCTTTTTTC      |                                        |
| EZH2-1#-R                                          | TCGAGAAAAAAGGACGGCTCCTCTAACCATGTTCTCTTGAACATGGTTAGAGGAGCCGTCCTCA |                                        |
| EZH2-2#-F                                          | TGAAATCTGAGAAGGGACCAGTTCAAGAGACTGGTCCCTTCTCAGATTTCTTTTTTC        |                                        |
| EZH2-2#-R                                          | TCGAGAAAAAAGAAATCTGAGAAGGGACCAGTCTCTTGAACCTGGTCCCTTCTCAGATTTCA   |                                        |
| hnRNPA1-1#-F                                       | TGAGAGCTGTCTCCAGAGAAGATTCAAGAGATCTTCTCTGGAGACAGCTCTCTTTTTTC      |                                        |
| hnRNPA1-1#-R                                       | TCGAGAAAAAAGAGAGCTGTCTCCAGAGAAGATCTCTTGAATCTTCTCTGGAGACAGCTCTCA  |                                        |
| hnRNPA1-2#-F                                       | TGGAACAGTTCGGTAAGCTCTTCAAGAGAGAGCTTACGGAAGTTCCTTTTTTC            |                                        |
| hnRNPA1-2#-R                                       | TCGAGAAAAAAGGAACAGTTCCGTAAGCTCTCTTGAAGAGCTTACGGAAGTTCCTCA        |                                        |
| hnRNPA2-1#-F                                       | TGGAACAGTTCGGTAAGCTCTTCAAGAGAGAGCTTACGGAAGTTCCTTTTTTC            |                                        |
| hnRNPA2-1#-R                                       | TCGAGAAAAAAGGAACAGTTCCGTAAGCTCTCTTGAAGAGCTTACGGAAGTTCCTCA        |                                        |
| hnRNPA3-1#-F                                       | TGAGAGCTGTTTCTAGAGAGGATTCAAGAGATCCTCTCTAGAAACAGCTCTCTTTTTTC      |                                        |
| hnRNPA3-1#-R                                       | TCGAGAAAAAAGAGAGCTGTTTCTAGAGAGGATCTCTTGAATCCTCTCTAGAAACAGCTCTCA  |                                        |
| hnRNPA3-2#-F                                       | TGAAACACCTGCTGACTTGCAGTTCAAGAGACTGCAAGTCAGCAGGTGTTCTTTTTTC       |                                        |
| hnRNPA3-2#-R                                       | TCGAGAAAAAAGAAACACCTGCTGACTTGCAGTCTCTTGAAGTCAAGTCAGCAGGTGTTCA    |                                        |
| PTBP1-1#-F                                         | TGTGACCTTAGCAGACCAGAGATTCAAGAGATCTCTGGTCTGCTAAGGTCACCTTTTTTC     |                                        |
| PTBP1-1#-R                                         | TCGAGAAAAAAGTGACCTTAGCAGACCAGAGATCTCTTGAATCTCTGGTCTGCTAAGGTCACA  |                                        |
| PTBP1-2#-F                                         | TGAAGCCGGGCTCCAAGAAGTCAAGAGAGTTCTTGGAGCCCGGCTCTTTTTTC            |                                        |
| PTBP1-2#-R                                         | TCGAGAAAAAAGAAGCCGGGCTCCAAGAAGTCTCTTGAAGTCTTGGAGCCCGGCTTCA       |                                        |
| SRSF1-1#-F                                         | TGAAGATATGACCTATGCAGTTCAAGAGACTGCATAGGTCATATCTTCTTTTTTC          |                                        |
| SRSF1-1#-R                                         | TCGAGAAAAAAGAAGATATGACCTATGCAGTCTCTTGAAGTCAAGGTCATATCTTCA        |                                        |

|               |                                                                     |
|---------------|---------------------------------------------------------------------|
| hnRNPC1-1#-F  | TGAGACGAAGACTGAGCGGTTGTTCAAGAGACAACCGCTCAGTCTTCGTCTCTTTTTTC         |
| hnRNPC1-1#-R  | TCGAGAAAAAAGAGACGAAGACTGAGCGGTTGTCTCTTGAACAACCGCTCAGTCTTCGTCTCA     |
| hnRNPM-1#-F   | TGATACAGAGCCTTCATTACATTCAAGAGATGTAATGAAGGCTCTGTATCTTTTTTC           |
| hnRNPM-1#-R   | TCGAGAAAAAAGATACAGAGCCTTCATTACATCTCTTGAATGTAATGAAGGCTCTGTATCA       |
| hnRNPH3-1#-F  | TGTAGCAGGAGTGAAATCAAAGGATTCAAGAGATCCTTTGATTTCACTCCTGCTACTTTTTTC     |
| hnRNPH3-1#-R  | TCGAGAAAAAAGTAGCAGGAGTGAAATCAAAGGATCTCTTGAATCCTTTGATTTCACTCCTGCTACA |
| SRPK2-1#-F    | TGACATGGTGGTCCAGCTCATTCAAGAGATGAGCTGGACCACCATGTCTTTTTTC             |
| SRPK2-1#-R    | TCGAGAAAAAAGACATGGTGGTCCAGCTCATCTCTTGAATGAGCTGGACCACCATGTCA         |
| SRPK3-1#-F    | TGAGAGACCATTGTCCAGCTCATTCAAGAGATGAGCTGGACAATGGTCTCTCTTTTTTC         |
| SRPK3-1#-R    | TCGAGAAAAAAGAGAGACCATTGTCCAGCTCATCTCTTGAATGAGCTGGACAATGGTCTCTCA     |
| SRPK3-2#-F    | TGCGCTTTGTGGCCCTCAAAGTTCAAGAGACTTTGAGGGCCACAAAGCGCTTTTTTC           |
| SRPK3-2#-R    | TCGAGAAAAAAGCGCTTTGTGGCCCTCAAAGTCTCTTGAACCTTTGAGGGCCACAAAGCGCA      |
| PRPF3-1#-F    | TGACAGTGAAGAGGGTCTGGGTTCAAGAGACCAGGACCCTCTTCACTGTCTTTTTTC           |
| PRPF3-1#-R    | TCGAGAAAAAAGACAGTGAAGAGGGTCTGGGTTCTTGAACCCAGGACCCTCTTCACTGTCA       |
| PRPF3-2#-F    | TGGCAGCCGATCATCTGAAACCTTCAAGAGAGGTTTCAGATGATCGGCTGCCTTTTTTC         |
| PRPF3-2#-R    | TCGAGAAAAAAGGCAGCCGATCATCTGAAACCTCTCTTGAAGGTTTCAGATGATCGGCTGCCA     |
| PSIP1-1#-F    | TGGTCGGCCATCATTCTGTTTTCAAGAGAAACAGGAATGATGGCCGACCTTTTTTC            |
| PSIP1-1#-R    | TCGAGAAAAAAGGTTCGGCCATCATTCTGTTTTCTCTTGAACAGGAATGATGGCCGACCA        |
| SFPQ-1#-F     | TGATCTACAGGGAAAGGCATTGTTCAAGAGACAATGCCTTTCCCTGTAGATCTTTTTTC         |
| SFPQ-1#-R     | TCGAGAAAAAAGATCTACAGGGAAAGGCATTGTCTCTTGAACAATGCCTTTCCCTGTAGATCA     |
| SF3A1-1#-F    | TGAAGCATCTTCAAAGGAGGATTCAAGAGATCCTCCTTTGAAGATGCTTCTTTTTTC           |
| SF3A1-1#-R    | TCGAGAAAAAAGAAGCATCTTCAAAGGAGGATCTCTTGAATCCTCCTTTGAAGATGCTTCA       |
| SF3A2-1#-F    | TGGTCAAGGTGGAGGTGAAGAAGTTCAAGAGACTTCTTCACCTCCACCTTGACCTTTTTTC       |
| SF3A2-1#-R    | TCGAGAAAAAAGGTCAAGGTGGAGGTGAAGAAGTCTCTTGAACTTCTTCACCTCCACCTTGACCA   |
| SF3A3-1#-F    | TGAGATACCTAGAGATGCTGCTTCAAGAGAGCAGCATCTCTAGGTATCTCTTTTTTC           |
| SF3A3-1#-R    | TCGAGAAAAAAGAGATACCTAGAGATGCTGCTCTCTTGAAGCAGCATCTCTAGGTATCTCA       |
| SF3B1-1#-F    | TGCTCAAGGAGTGGGCCTCGA TTCAAGAGATCGAGGCCACTCCTTGAGCTTTTTTC           |
| SF3B1-1#-R    | TCGAGAAAAAAGCTCAAGGAGTGGGCCTCGATCTCTTGAATCGAGGCCACTCCTTGAGCA        |
| SF3B3-1#-F    | TGAGTGGATGCCGTCGCATCGTTCAAGAGACGATGCGACGGCATCCACTCTTTTTTC           |
| SF3B3-1#-R    | TCGAGAAAAAAGAGTGGATGCCGTCGCATCGTCTCTTGAACGATGCGACGGCATCCACTCA       |
| SF3B3-2#-F    | TGAAGTGGATGACTCCTTCCTTCAAGAGAGGAAGGAGTCTACTCAGTCTTTTTTC             |
| SF3B3-2#-R    | TCGAGAAAAAAGAAGTGGATGACTCCTTCCTCTCTTGAAGGAAGGAGTCTACTCAGTTCA        |
| LacZ-F        | TGTGACCAGCGAATACCTGTTTCAAGAGAACAGGTATTTCGCTGGTCACTTTTTTC            |
| LacZ-R        | TCGAGAAAAAAGTGACCAGCGAATACCTGTTTCTCTTGAACAGGTATTTCGCTGGTCA          |
| sgEZH2-F      | CACCGACACGCTCCGCCAACAAC                                             |
| sgEZH2-R      | AAACGTTTGTGGCGGAAGCGTGTC                                            |
| sgHOTAIR-1#-F | CACCGGACCCCTGCCAGGTCTAGC                                            |
| sgHOTAIR-1#-R | AAACGCTAGACCTGGCAGGGGGTCC                                           |
| sgHOTAIR-2#-F | CACCGGAGAGAGACACGTGAGACCC                                           |
| sgHOTAIR-2#-R | AAACGGGTCTCACGTGTCTCTCTCC                                           |
| sgHOTAIR-3#-F | CACCGGCCCTTCTCCTAGCCACCG                                            |
| sgHOTAIR-3#-R | AAACCGGTGGGCTAGGAGAAGGGCC                                           |

| <b>Primers for real-time quantitative PCR analysis</b> |                                                              |                                            |
|--------------------------------------------------------|--------------------------------------------------------------|--------------------------------------------|
| GAPDH                                                  | F: CCTTCATTGACCTCAACTACA<br>R: GCTCCTGGAAGATGGTGAT           | 95°C, 15s; 60°C, 15s; 72°C, 45s; 40 cycles |
| HOTAIR                                                 | F: TTCGCAGTGAATGGAACGGA<br>R: TACCAGGTCGGTACTGGCTT           | 95°C, 15s; 60°C, 15s; 72°C, 45s; 40 cycles |
| HOXA9                                                  | F: TTGGAGGAAATGAATGCTGA<br>R: TGGTCAGTAGGCCTTGAGGT           | 95°C, 15s; 60°C, 15s; 72°C, 45s; 40 cycles |
| DAB2IP                                                 | F: TGGACGATGTGCTCTATGCC<br>R: GGATGGTGATGGTTTGGTAG           | 95°C, 15s; 60°C, 15s; 72°C, 45s; 40 cycles |
| SF3A1                                                  | F: AGGAAGTTGAGATGGAGGTCC<br>R: CTTGCGGACAATGACTTGGTC         | 95°C, 15s; 60°C, 15s; 72°C, 45s; 40 cycles |
| SF3A2                                                  | F: GTGTCTCCCAGTCTGCTAAA<br>R: AGGCAGAGTTTGCATTCATAG          | 95°C, 15s; 60°C, 15s; 72°C, 45s; 40 cycles |
| SF3A3                                                  | F: TGTGGAAACTACACCTACCGA<br>R: CCAAAAGCTGAGCTACATCC          | 95°C, 15s; 60°C, 15s; 72°C, 45s; 40 cycles |
| SF3B1                                                  | F: CACAGACCTCCAAAGATTGC<br>R: GCTGCTCCATTGACGACTT            | 95°C, 15s; 60°C, 15s; 72°C, 45s; 40 cycles |
| SF3B2                                                  | F: TTACGAGCCCAACTTTATCT<br>R: GTGAAGCGGTTTCATTCCG            | 95°C, 15s; 60°C, 15s; 72°C, 45s; 40 cycles |
| SF3B3                                                  | F: GGCGAGCCGTTATGATTAGT<br>R: AGGTCTAGCTCATAGAAAGTAAG        | 95°C, 15s; 60°C, 15s; 72°C, 45s; 40 cycles |
| SF3B4                                                  | F: CCAGTAGTCAACACCCACAT<br>R: ATGCTTTGTTACCCGTATT            | 95°C, 15s; 60°C, 15s; 72°C, 45s; 40 cycles |
| EZH2<br>(Total)                                        | F: TTCTGTGCCATTGCTAGGTTA<br>R: CTTTTCTTGGAGGAGTATC           | 95°C, 15s; 60°C, 15s; 72°C, 45s; 40 cycles |
| EZH2-E14 (exon14<br>containing only)                   | F: GTCAAAGAATCTAGCATCATAGCTC<br>R: TAGTTGTAAACATGGTTAGAGG    | 95°C, 15s; 60°C, 15s; 72°C, 45s; 40 cycles |
| <b>Primers for RT-PCR analysis</b>                     |                                                              |                                            |
| AsEZH2                                                 | F: CACTGCAGAAAGATACAGCT<br>R: CAAGTAAGACAGAGGTCAGGGT         | 94°C, 30s; 58°C, 30s; 72°C, 30s; 40 cycles |
| CKO-Target                                             | F: TGTTCCTATAATATGGCCGCA<br>R: TTACACGCTTCCGCCAACA           | 94°C, 30s; 58°C, 30s; 72°C, 30s; 40 cycles |
| CKO-Exon3                                              | F: ACAGATGTGGTGTGTTTTGTATTATT<br>R: ATGTTATGTTAACCAACCTCCCTA | 94°C, 30s; 58°C, 30s; 72°C, 30s; 40 cycles |
| <b>Primers for ChIP-qPCR analysis</b>                  |                                                              |                                            |
| HOXA9<br>(promoter)                                    | F: TCGCCAACCAACACAACAGTC<br>R: AAAGGGATCGTGCCGCTCTAC         | 95°C, 15s; 60°C, 15s; 72°C, 45s; 40 cycles |
| HOXA9<br>(Exon 2)                                      | F: CATAGATTCATCTTTCTCCAC<br>R: ACACAACAATTTGGTCAGTAGG        | 95°C, 15s; 60°C, 15s; 72°C, 45s; 40 cycles |
