# Supplementary material
Source: PubMed Central journal article supplement (PMC5440213)
Supplement: NIHMS837798-supplement-Supplementary_Table_S2.pdf [file NIHMS837798-supplement-Supplementary_Table_S2.pdf]

**Supplementary Table S2: Characteristics of 24 patients from Tongji Hospital**

|                  |        |           |
|------------------|--------|-----------|
| Age(y)           | > =51  | 12(50%)   |
|                  | < 51   | 12(50%)   |
| Gender           | Male   | 14(58%)   |
|                  | Female | 10(42%)   |
| Clinical Stage   | I      | 14(58%)   |
|                  | II     | 8(33%)    |
|                  | III    | 1(4.5%)   |
|                  | IV     | 1(4.5%)   |
| T classification | T1     | 15(62.5%) |
|                  | T2     | 7(29%)    |
|                  | T3     | 2(8.5%)   |
