# Supplementary material
Source: PubMed Central journal article supplement (PMC5440213)
Supplement: NIHMS837798-supplement-Supplementary_Table_S3.pdf [file NIHMS837798-supplement-Supplementary_Table_S3.pdf]

| Fold change     |                  |                  |                  |                  |                  |                  |        |           |            | Annotations |           |       |        |           |           |      |                |          |           |                     |             |                                                                        |
|-----------------|------------------|------------------|------------------|------------------|------------------|------------------|--------|-----------|------------|-------------|-----------|-------|--------|-----------|-----------|------|----------------|----------|-----------|---------------------|-------------|------------------------------------------------------------------------|
| ProbeName       | [103T] vs [103N] | [104T] vs [104N] | [109T] vs [109N] | [110T] vs [110N] | [119T] vs [119N] | [120T] vs [120N] | type   | seqname   | GeneSymbol | source      | RNAlength | chrom | strand | txStart   | txEnd     | Xhyb | probeSeq       | EntrezID | unigene   | GO                  | ProteinAcce | product                                                                |
| ASHG19A3A029250 | 3.0334985        |                  |                  | -2.4515448       |                  | 8.88348          | coding | NM_031266 | HNRNPAB    | RefSeq_codi | 1837      | chr5  | +      | 177631507 | 177638183 |      | TCAGAGTC3182   |          | Hs.591731 | GO:0003688NP_112556 |             | Heterogeneous nuclear ribonucleoprotein A/B                            |
| ASHG19A3A005217 | 5.2145667        | 2.1745803        |                  |                  |                  | 3.1623528        | coding | NM_021644 | HNRNP3     | RefSeq_codi | 2382      | chr10 | +      | 70091767  | 70102952  |      | GGTTATTA3189   |          | Hs.643472 | GO:0003723NP_067676 |             | Heterogeneous nuclear ribonucleoprotein H3 (2H9)                       |
| ASHG19A3A016647 |                  | 3.0594022        |                  |                  | 2.4225197        | 5.413126         | coding | NM_194247 | HNRNP3     | RefSeq_codi | 5808      | chr2  | +      | 178077421 | 178088685 |      | GAATGT220988   |          | Hs.516539 | GO:0003723NP_919223 |             | Heterogeneous nuclear ribonucleoprotein A3                             |
| ASHG19A3A001508 |                  | -2.0576186       |                  |                  |                  | -2.2072835       | coding | NM_001077 | HNRNPC     | RefSeq_codi | 3226      | chr14 | -      | 21677297  | 21737638  |      | AACACCC3183    |          | Hs.508848 | GO:0003723NP_112604 |             | Heterogeneous nuclear ribonucleoprotein C (C1/C2)                      |
| ASHG19A3A003913 |                  |                  |                  |                  |                  | -2.5210278       | coding | NM_001533 | HNRNPL     | RefSeq_codi | 2129      | chr19 | -      | 39327028  | 39340617  |      | gcgggggggc3191 |          | Hs.644906 | GO:0003723NP_001524 |             | Heterogeneous nuclear ribonucleoprotein L                              |
| ASHG19A3A005448 |                  |                  |                  |                  |                  | -4.5613346       | coding | NM_031262 | HNRNPK     | RefSeq_codi | 2935      | chr9  | -      | 86582998  | 86595569  |      | ATGCACAC3190   |          | Hs.522257 | GO:0003677NP_112553 |             | Heterogeneous nuclear ribonucleoprotein K                              |
| ASHG19A3A041305 |                  |                  |                  |                  |                  | -2.266011        | coding | NM_001032 | HNRNP2     | RefSeq_codi | 2315      | chrX  | +      | 100663190 | 100669115 |      | CATGTTTG6173   |          | Hs.432485 | GO:0005515NP_066357 |             | Ribosomal protein L36a                                                 |
| ASHG19A3A012167 |                  |                  |                  |                  |                  | -2.5504644       | coding | NM_005968 | HNRNPM     | RefSeq_codi | 2553      | chr19 | +      | 8509802   | 8553994   |      | TGATTAC14670   |          | Hs.465808 | GO:0003723NP_112480 |             | Heterogeneous nuclear ribonucleoprotein M                              |
| ASHG19A3A011973 |                  | -5.739483        |                  |                  |                  | -2.3587754       | coding | NM_002819 | PTBP1      | RefSeq_codi | 3340      | chr19 | +      | 797391    | 812327    |      | GGTATAA15725   |          | Hs.172550 | GO:0003723NP_787041 |             | Poly(pyrimidine tract binding protein 1                                |
| ASHG19A3A003535 |                  | -2.5619657       |                  |                  |                  | -2.3441238       | coding | NM_001170 | SRPK3      | RefSeq_codi | 1900      | chrX  | +      | 153046455 | 153051186 |      | GGCAGCG26576   |          | Hs.104865 | GO:0005524NP_055185 |             | SRSF protein kinase 3                                                  |
| ASHG19A3A033341 |                  |                  |                  |                  |                  | -2.0918567       | coding | NM_182692 | SRPK2      | RefSeq_codi | 3671      | chr7  | -      | 104756823 | 105029341 |      | CGTCGCC6733    |          | Hs.285197 | GO:0005524NP_872634 |             | SRSF protein kinase 2                                                  |
| ASHG19A3A022042 |                  | 2.430689         |                  |                  |                  | -9.527317        | coding | NM_004593 | TRA2B      | RefSeq_codi | 4290      | chr3  | -      | 185632359 | 185655924 |      | CTCTATAA6434   |          | Hs.531322 | GO:0003723NP_004584 |             | Transformer 2 beta homolog (Drosophila)                                |
| ASHG19A3A043221 |                  | 2.7555702        |                  |                  |                  | 2.080928         | coding | NM_005066 | SFPQ       | RefSeq_codi | 3073      | chr1  | -      | 35649202  | 35658743  |      | AAAGGCA 6421   |          | Hs.355934 | GO:0003677NP_005057 |             | Splicing factor proline/glutamine-rich                                 |
| ASHG19A3A005770 |                  |                  |                  |                  |                  | 2.4541771        | coding | NM_130438 | DYRK1A     | RefSeq_codi | 5088      | chr21 | +      | 38792600  | 38887678  |      | ACCTCCA1859    |          | Hs.368240 | GO:0005524NP_569122 |             | Dual-specificity tyrosine-(Y)-phosphorylation regulated kinase 1A      |
| ASHG19A3A017619 |                  | 2.0076218        |                  |                  |                  | 3.0076554        | coding | NM_004902 | RBM39      | RefSeq_codi | 2791      | chr20 | +      | 34291531  | 34330193  |      | GGGTTAC19584   |          | Hs.282901 | GO:0003723NP_909122 |             | RNA binding motif protein 39                                           |
| ASHG19A3A013371 |                  |                  |                  |                  |                  | 4.3147182        | coding | NM_016047 | SF3B14     | RefSeq_codi | 783       | chr2  | -      | 24290454  | 24299314  |      | CTATCGGC51639  |          | Hs.177861 | GO:0003723NP_057131 |             | Splicing factor 3B, 14 kDa subunit                                     |
| ASHG19A3A001360 |                  | 2.8628976        |                  |                  |                  |                  | coding | NM_001040 | U2AF1L4    | RefSeq_codi | 792       | chr19 | -      | 36233429  | 36236336  |      | CATGCTG1199746 |          | Hs.351558 | GO:0003723NP_659424 |             | U2 small nuclear RNA auxiliary factor 1-like 4                         |
| ASHG19A3A004544 |                  | 2.7370296        |                  |                  |                  | -2.2739232       | coding | NM_006758 | U2AF1      | RefSeq_codi | 971       | chr21 | -      | 44513065  | 44527688  |      | TCGGTTGC7307   |          | Hs.365116 | GO:0003723NP_006749 |             | U2 small nuclear RNA auxiliary factor 1                                |
| ASHG19A3A013081 |                  |                  |                  |                  |                  | 2.433374         | coding | NM_001012 | U2AF2      | RefSeq_codi | 3136      | chr19 | +      | 56165415  | 56186081  |      | CTACTCTC11338  |          | Hs.528007 | GO:0070742NP_009210 |             | U2 small nuclear RNA auxiliary factor 2                                |
| ASHG19A3A030640 |                  | 4.224404         | 3.651587         | 2.7329814        |                  | 2.056424         | coding | NM_004698 | PRPF3      | RefSeq_codi | 2480      | chr1  | +      | 150293927 | 150325703 |      | AAATTTG9129    |          | Hs.11776  | GO:0005515NP_004689 |             | PRP3 pre-mRNA processing factor 3 homolog (S. cerevisiae)              |
| ASHG19A3A039127 |                  | 2.1522481        |                  |                  |                  | -2.5694952       | coding | NM_004697 | PRPF4      | RefSeq_codi | 2756      | chr9  | +      | 116037973 | 116055054 |      | AGGAGCA.9128   |          | Hs.530284 | GO:0005515NP_004688 |             | PRP4 pre-mRNA processing factor 4 homolog (yeast)                      |
| ASHG19A3A045239 |                  |                  |                  |                  |                  | -2.023461        | coding | NM_014502 | PRPF19     | RefSeq_codi | 2342      | chr11 | -      | 60658020  | 60674061  |      | TTGACAA/27339  |          | Hs.502705 | GO:0003677NP_055317 |             | PRP19/PSO4 pre-mRNA processing factor 19 homolog (S. cerevisiae)       |
| ASHG19A3A013003 |                  | 2.7194836        |                  |                  |                  |                  | coding | NM_015629 | PRPF31     | RefSeq_codi | 2201      | chr19 | +      | 54618789  | 54635150  |      | TAAGTAC126121  |          | Hs.515598 | GO:0003723NP_056444 |             | PRP31 pre-mRNA processing factor 31 homolog (S. cerevisiae)            |
| ASHG19A3A054764 |                  | 2.7828064        | 3.0183098        | 2.0387087        |                  | 4.2496533        | coding | NM_012426 | SF3B3      | RefSeq_codi | 9736      | chr16 | +      | 70557690  | 70611570  |      | AAGACCC23450   |          | Hs.514435 | GO:0003676NP_036558 |             | Splicing factor 3b, subunit 3, 130kDa                                  |
| ASHG19A3A043766 |                  | 2.15882          |                  |                  |                  |                  | coding | NM_006802 | SF3A3      | RefSeq_codi | 2855      | chr1  | -      | 38422653  | 38455761  |      | GAGACCC10946   |          | Hs.77897  | GO:0046872NP_006793 |             | Splicing factor 3a, subunit 3, 60kDa                                   |
| ASHG19A3A004721 |                  |                  |                  |                  |                  | -3.1859674       | coding | NM_014281 | PUF60      | RefSeq_codi | 1853      | chr8  | -      | 144898548 | 144911537 |      | GCAGCAG22827   |          | Hs.521924 | GO:0003677NP_510965 |             | Poly-U binding splicing factor 60kDa                                   |
| ASHG19A3A037139 |                  | 2.0154915        | 2.1092439        | 2.1071062        |                  | 2.1713371        | coding | NM_021144 | PSIP1      | RefSeq_codi | 1690      | chr9  | -      | 15470643  | 15510287  |      | CTGAGAA111168  |          | Hs.726445 | GO:0003677NP_150091 |             | PC4 and SFRS1 interacting protein 1                                    |
| ASHG19A3A012901 |                  | -2.9223475       |                  |                  |                  |                  | coding | NM_021228 | SCAF1      | RefSeq_codi | 4323      | chr19 | +      | 50145381  | 50161905  |      | GCCATAC158506  |          | Hs.103521 | GO:0003723NP_067051 |             | SR-related CTD-associated factor 1                                     |
| ASHG19A3A045058 |                  | 2.3553817        |                  |                  |                  |                  | coding | NM_001033 | CSF3       | RefSeq_codi | 655       | chr11 | -      | 33162977  | 33183037  |      | GGTCTTTT1479   |          | Hs.44402  | GO:0003723NP_001317 |             | Cleavage stimulation factor, 3' pre-RNA, subunit 3, 77kDa              |
| ASHG19A3A042801 |                  |                  |                  |                  |                  | 2.0473845        | coding | NM_015235 | CSF2T      | RefSeq_codi | 4127      | chr10 | -      | 53455246  | 53459355  |      | CATTTTGA23283  |          | Hs.591358 | GO:0003723NP_056050 |             | Cleavage stimulation factor, 3' pre-RNA, subunit 2, 64kDa, tau variant |
| ASHG19A3A004821 |                  | 3.4057038        | 2.4724438        |                  |                  | 2.0964541        | coding | NM_015484 | SYF2       | RefSeq_codi | 1777      | chr1  | -      | 25548766  | 25559013  |      | AAATCCC25949   |          | Hs.20013  | GO:0008380NP_997053 |             | SYF2 homolog, RNA splicing factor (S. cerevisiae)                      |
