# Supplementary material
Source: PubMed Central journal article supplement (PMC5440213)
Supplement: NIHMS837798-supplement-Supplementary_Table_S4.pdf [file NIHMS837798-supplement-Supplementary_Table_S4.pdf]

Characteristics of 90 patients from tissue microarray

| Number | Months | Status | sex    | age | Tumor volume   | T | N | M | Stage | Grade | SF3B3 expression |
|--------|--------|--------|--------|-----|----------------|---|---|---|-------|-------|------------------|
| 1      | 69     | Alive  | male   | 42  | 8×6×5cm        | 2 | 0 | 0 | 2     | 2     | Low              |
| 2      | 69     | Alive  | female | 43  | 6.5×6.5cm      | 1 | 0 | 0 | 1     | 1     | Low              |
| 3      | 69     | Alive  | female | 76  | 6.5×4.5×4cm    | 1 | 0 | 0 | 1     | 1     | Low              |
| 4      | 36     | Dead   | female | 48  | 2.7×2.1×2cm    | 1 | 0 | 0 | 1     | 1     | Low              |
| 5      | 67     | Alive  | female | 49  | 9×8×6cm        | 2 | 0 | 0 | 2     | 2     | Low              |
| 6      | 6      | Dead   | female | 66  | 7.5×6×6cm      | 2 | 0 | 0 | 2     | 2     | Low              |
| 7      | 83     | Alive  | male   | 29  | 4×3.7×3.5cm    | 1 | 0 | 0 | 1     | 1     | Low              |
| 8      | 83     | Alive  | female | 66  | 10×6×5cm       | 2 | 0 | 0 | 2     | 2     | Low              |
| 9      | 83     | Alive  | male   | 71  | 8×7.5×6.5cm    | 2 | 0 | 0 | 2     | 2     | High             |
| 10     | 82     | Alive  | male   | 62  | 5.5×4×5cm      | 1 | 0 | 0 | 1     | 1     | Low              |
| 11     | 67     | Alive  | male   | 42  | 6×5×5cm        | 1 | 0 | 0 | 1     | 1     | Low              |
| 12     | 66     | Alive  | female | 65  | 4.5×4×3.2cm    | 1 | 0 | 0 | 1     | 1     | High             |
| 13     | 66     | Alive  | female | 50  | 5×5×4cm        | 1 | 0 | 0 | 1     | 1     | Low              |
| 14     | 66     | Alive  | male   | 62  | 5×4.5×4cm      | 1 | 0 | 0 | 1     | 1     | High             |
| 15     | 32     | Dead   | male   | 79  | 4×3×3cm        | 1 | 0 | 0 | 1     | 1     | High             |
| 16     | 67     | Dead   | female | 73  | 8×7×6cm        | 2 | 1 | 0 | 2     | 2     | High             |
| 17     | 82     | Alive  | male   | 44  | 3×2.5×2cm      | 1 | 0 | 0 | 1     | 1     | High             |
| 18     | 82     | Alive  | female | 52  | 2.5×2.5×2cm    | 1 | 0 | 0 | 1     | 1     | Low              |
| 19     | 82     | Alive  | female | 73  | 3.5×2×2cm      | 1 | 0 | 0 | 1     | 1     | Low              |
| 20     | 82     | Alive  | male   | 73  | 2×1.7×1.5cm    | 1 | 0 | 0 | 1     | 1     | Low              |
| 21     | 82     | Alive  | male   | 44  | 7×6.5×6cm      | 1 | 0 | 0 | 1     | 1     | Low              |
| 22     | 67     | Alive  | female | 52  | 8×8.5×5.4cm    | 3 | 2 | 0 | 3     | 3     | High             |
| 23     | 41     | Dead   | female | 57  | 8×7×6cm        | 2 | 0 | 0 | 2     | 2     | High             |
| 24     | 61     | Dead   | male   | 78  | 7×5×4cm        | 1 | 0 | 0 | 1     | 1     | Low              |
| 25     | 2      | Dead   | male   | 55  | 4×3.5×3.5cm    | 1 | 0 | 0 | 1     | 1     | Low              |
| 26     | 81     | Alive  | female | 49  | 3×2.5×1.5, 5×  | 1 | 0 | 0 | 1     | 1     | Low              |
| 27     | 80     | Alive  | male   | 61  | 3.5×3×1cm      | 1 | 0 | 0 | 1     | 1     | Low              |
| 28     | 8      | Dead   | female | 67  | 4×4×3cm        | 1 | 1 | 0 | 1     | 3     | Low              |
| 29     | 80     | Alive  | male   | 52  | 10×10×8.2cm    | 2 | 0 | 0 | 2     | 2     | High             |
| 30     | 72     | Dead   | male   | 62  | 14×10×7cm      | 2 | 0 | 0 | 2     | 2     | Low              |
| 31     | 80     | Alive  | female | 44  | 10×10×8.2cm    | 2 | 0 | 0 | 2     | 2     | High             |
| 32     | 80     | Alive  | male   | 57  | 5.5×4.5×3.5cm  | 1 | 0 | 0 | 1     | 1     | High             |
| 33     | 8      | Dead   | female | 74  | 0.2-2.5×1.5×1c | 3 | 0 | 0 | 3     | 3     | High             |
| 34     | 34     | Dead   | male   | 65  | 7×7×4cm        | 1 | 0 | 0 | 1     | 1     | Low              |
| 35     | 78     | Alive  | female | 60  | 7×6×4.5cm      | 1 | 0 | 0 | 1     | 1     | Low              |
| 36     | 78     | Alive  | female | 57  | 4×3.5×3cm      | 1 | 0 | 0 | 1     | 1     | Low              |
| 37     | 78     | Alive  | female | 48  | 2.5×2.5×2.5cm  | 1 | 0 | 0 | 1     | 1     | Low              |
| 38     | 78     | Alive  | male   | 72  | 4×3×2.5cm, 2.5 | 1 | 0 | 0 | 1     | 1     | High             |
| 39     | 35     | Dead   | female | 42  | 7×7×4cm        | 3 | 0 | 0 | 3     | 3     | High             |
| 40     | 77     | Alive  | female | 78  | 3.8×3.5×3cm    | 1 | 0 | 0 | 1     | 1     | Low              |
| 41     | 77     | Alive  | female | 44  | 7×5×4cm        | 1 | 0 | 0 | 1     | 1     | High             |
| 42     | 77     | Alive  | male   | 60  | 3.5×2.5×2cm    | 1 | 0 | 0 | 1     | 1     | High             |
| 43     | 63     | Dead   | male   | 37  | 9×6×4cm        | 2 | 0 | 0 | 2     | 2     | High             |
| 44     | 77     | Alive  | male   | 50  | 2.4×2×2cm      | 1 | 0 | 0 | 1     | 1     | High             |
| 45     | 3      | Dead   | male   | 57  | 11×8×8cm       | 3 | 0 | 0 | 3     | 3     | High             |
| 46     | 45     | Dead   | male   | 67  | 3.5×3.5×3cm    | 1 | 0 | 0 | 1     | 1     | High             |
| 47     | 76     | Alive  | female | 57  | 5×5×3cm        | 1 | 0 | 0 | 1     | 1     | Low              |
| 48     | 76     | Alive  | male   | 65  | 5×4.5×4cm      | 1 | 0 | 0 | 1     | 1     | Low              |
| 49     | 48     | Dead   | female | 71  | 8×6×5.5cm      | 2 | 0 | 0 | 2     | 2     | High             |
| 50     | 76     | Alive  | female | 39  | 3.5×3.5×3cm    | 1 | 0 | 0 | 1     | 1     | High             |
| 51     | 61     | Dead   | female | 72  | 10×8×5cm       | 2 | 0 | 0 | 2     | 2     | Low              |
| 52     | 8      | Dead   | male   | 54  | 9×8×8cm        | 3 | 0 | 1 | 3     | 4     | High             |
| 53     | 76     | Alive  | male   | 55  | 9×8×7.5cm      | 2 | 0 | 0 | 2     | 2     | Low              |
| 54     | 49     | Dead   | male   | 57  | 4×3.8×2.8cm    | 1 | 0 | 0 | 1     | 1     | Low              |
| 55     | 75     | Alive  | female | 48  | 11×9.5×5.5cm   | 3 | 0 | 0 | 3     | 3     | Low              |
| 56     | 36     | Dead   | male   | 70  | 4×3.5×3cm      | 1 | 0 | 0 | 1     | 1     | High             |
| 57     | 75     | Alive  | male   | 48  | 6×4×3.5cm      | 1 | 0 | 0 | 1     | 1     | Low              |
| 58     | 75     | Alive  | male   | 70  | 4×3.5×2.5cm    | 1 | 0 | 0 | 1     | 1     | High             |
| 59     | 59     | Dead   | male   | 77  | 5.5×4.5×4.5cm  | 1 | 0 | 0 | 1     | 1     | High             |
| 60     | 75     | Alive  | male   | 37  | 4×4×3.5cm      | 1 | 0 | 0 | 1     | 1     | Low              |
| 61     | 75     | Alive  | male   | 75  | 3×3×2cm        | 1 | 0 | 0 | 1     | 1     | Low              |
| 62     | 75     | Alive  | male   | 51  | 5×4×3cm        | 1 | 0 | 0 | 1     | 1     | High             |
| 63     | 62     | Dead   | female | 82  | 6.5×6.5×4cm    | 1 | 0 | 0 | 1     | 1     | High             |
| 64     | 74     | Alive  | male   | 64  | 4×3×2.5cm      | 1 | 0 | 0 | 1     | 1     | Low              |
| 65     | 32     | Dead   | female | 66  | 11×10×6.5cm    | 3 | 0 | 1 | 3     | 4     | Low              |
| 66     | 74     | Alive  | female | 55  | 5.5×5×4cm      | 1 | 0 | 0 | 1     | 1     | High             |
| 67     | 74     | Alive  | male   | 55  | 4.5×4×3.5cm    | 1 | 0 | 0 | 1     | 1     | High             |
| 68     | 66     | Dead   | female | 61  | 8.5×6.5×6cm    | 2 | 0 | 0 | 2     | 2     | High             |
| 69     | 74     | Alive  | male   | 54  | 3.5×3×3cm      | 1 | 0 | 0 | 1     | 1     | High             |
| 70     | 18     | Dead   | male   | 59  | 10×7×6.5cm     | 2 | 0 | 0 | 2     | 2     | High             |
| 71     | 72     | Alive  | male   | 66  | 3.3×3.2×2.5cm  | 1 | 0 | 0 | 1     | 1     | High             |
| 72     | 72     | Alive  | female | 73  | 7×6×4cm        | 1 | 0 | 0 | 1     | 1     | Low              |
| 73     | 47     | Dead   | female | 43  | 11×9×7cm       | 2 | 0 | 0 | 2     | 2     | Low              |
| 74     | 43     | Dead   | male   | 79  | 4×3×3cm        | 1 | 0 | 0 | 1     | 1     | High             |
| 75     | 71     | Alive  | male   | 71  | 5.3×5×3.5cm    | 1 | 0 | 0 | 1     | 1     | Low              |
| 76     | 70     | Alive  | male   | 54  | 5.5×5×4cm      | 1 | 0 | 0 | 1     | 1     | Low              |
| 77     | 70     | Alive  | female | 46  | 4.5×3.8×3.5cm  | 1 | 0 | 0 | 1     | 1     | Low              |
| 78     | 69     | Alive  | male   | 55  | 4×4×4cm        | 1 | 0 | 0 | 1     | 1     | Low              |
| 79     | 69     | Alive  | male   | 61  | 3.5×2.5×2.5cm  | 1 | 0 | 0 | 1     | 1     | High             |
| 80     | 69     | Alive  | male   | 51  | 2.5×2×1.7cm    | 1 | 0 | 0 | 1     | 1     | Low              |
| 81     | 69     | Alive  | female | 70  | 3×3×2.5cm      | 1 | 0 | 0 | 1     | 1     | Low              |
| 82     | 69     | Alive  | female | 55  | 3×2.2×1.7cm    | 1 | 0 | 0 | 1     | 1     | Low              |
| 83     | 45     | Dead   | male   | 60  | 10.5×9×4.5cm   | 2 | 0 | 0 | 2     | 2     | High             |
| 84     | 69     | Alive  | male   | 64  | 4.5×4.5×4cm    | 1 | 0 | 0 | 1     | 1     | High             |
| 85     | 69     | Alive  | female | 57  | 5×4.8×4cm      | 1 | 0 | 0 | 1     | 1     | Low              |
| 86     | 69     | Alive  | male   | 55  | 6×5×5cm        | 1 | 0 | 0 | 1     | 1     | Low              |
| 87     | 69     | Alive  | female | 64  | 5×5×4cm        | 1 | 0 | 0 | 1     | 1     | Low              |
| 88     | 68     | Alive  | male   | 59  | 7×6×5cm        | 1 | 0 | 0 | 1     | 1     | Low              |
| 89     | 67     | Alive  | male   | 70  | 2×2×1.5cm      | 1 | 0 | 0 | 1     | 1     | Low              |
| 90     | 30     | Dead   | male   | 64  | 5×4.5×3.5cm    | 1 | 0 | 0 | 1     | 1     | High             |
