# Supplementary material
Source: PubMed Central journal article supplement (PMC5440213)
Supplement: NIHMS837798-supplement-Supplementary_Table_S5.pdf [file NIHMS837798-supplement-Supplementary_Table_S5.pdf]

Table S5

Table S5: Clinical characteristics and outcome of 90 renal clear cell cancer patients according to SF3B3 gene expression status

| Clinicopathological Variables |                  | Tumor SF3B3 expression |          | P Value            |
|-------------------------------|------------------|------------------------|----------|--------------------|
|                               |                  | Negative               | Positive |                    |
| Age                           | >=59             | 26                     | 18       | 0.532              |
|                               | <59              | 24                     | 22       |                    |
| Sex                           | Male             | 25                     | 14       | 0.2                |
|                               | Female           | 25                     | 26       |                    |
| Tumor size                    | >=7cm            | 35                     | 24       | 0.375              |
|                               | <7cm             | 15                     | 16       |                    |
| Grade                         | I                | 21                     | 12       | 0.26               |
|                               | II- IV           | 29                     | 28       |                    |
| Stage                         | T <sub>1</sub>   | 41                     | 24       | 0.032*             |
|                               | T <sub>2-3</sub> | 9                      | 16       |                    |
| Metastasis                    | No               | 46                     | 35       | 0.504 <sup>#</sup> |
|                               | Yes              | 4                      | 5        |                    |

NOTE: \* P<0.05. # Fisher's exact test.
