# Supplementary material
Source: PubMed Central journal article supplement (PMC5440213)
Supplement: NIHMS837798-supplement-Supplementary_Table_S6.pdf [file NIHMS837798-supplement-Supplementary_Table_S6.pdf]

**Table S6. EZH2 inhibitors in clinical development**

| <b>Compound</b> | <b>Other Names</b>  | <b>Mechanism</b>                  | <b>Selectivity</b>                                          | <b>Status</b> | <b>Ref(s).</b> |
|-----------------|---------------------|-----------------------------------|-------------------------------------------------------------|---------------|----------------|
| DZNep           | deazaneplanocin     | inhibitor of methyltransferases   | Non-specific                                                | Preclinical   | [1-5]          |
| EPZ005687       |                     | SAM-competitive inhibitor of EZH2 | >500-fold over other HMTs, ~50-fold over EZH1               | Preclinical   | [6]            |
| EPZ-6438        | E7438, Tazemetostat | SAM-competitive inhibitor of EZH2 | >4,500-fold over 14 other HMTs, 35-fold over EZH1           | Phase 1/2     | [7, 8]         |
| GSK343          |                     | SAM-competitive inhibitor of EZH2 | 1,000-fold over other HMTs, 60-fold over EZH1               | Preclinical   | [9]            |
| GSK503          |                     | selective EZH2 inhibitor          | Unknown                                                     | Preclinical   | [10]           |
| GSK926          |                     | SAM-competitive inhibitor of EZH2 | Unknown                                                     | Preclinical   | [9]            |
| GSK126          | GSK2816126          | SAM-competitive inhibitor of EZH2 | >1,000-fold over 20 other HMTs, 150-fold over EZH1          | Phase 1       | [11]           |
| EI1             |                     | SAM-competitive inhibitor of EZH2 | >10,000-fold over other HMTs, ~90-fold over EZH1            | Preclinical   | [12]           |
| CPI-169         |                     | selective EZH2 inhibitor          | Unknown                                                     | Preclinical   | [13]           |
| CPI-360         |                     | SAM-competitive inhibitor of EZH2 | >10,000-fold over 30 different enzymes, ~100-fold over EZH1 | Preclinical   | [13]           |
| CPI-1205        |                     | selective EZH2 inhibitor          | Unknown                                                     | Phase 1       | [14, 15]       |
| UNC1999         |                     | SAM-competitive inhibitor of PRC2 | 10,000-fold over other HMTs, tenfold over EZH1              | Preclinical   | [16]           |
